# Supplementary material for: Determination of tannic acid based on luminol chemiluminescence catalyzed by cupric oxide nanoparticles
Source: Royal Society of Chemistry journal article supplement (doi:10.1039/c4ay02736a), 2015-01-01
Supplement: c4ay02736a1.pdf [file c4ay02736a1.pdf]

Supporting information

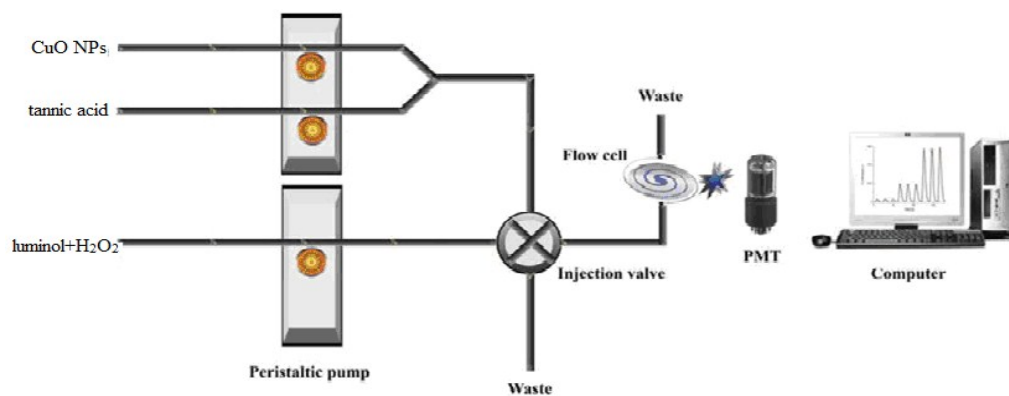

Fig. S1. Diagram of the flow-injection chemiluminescence detection system.

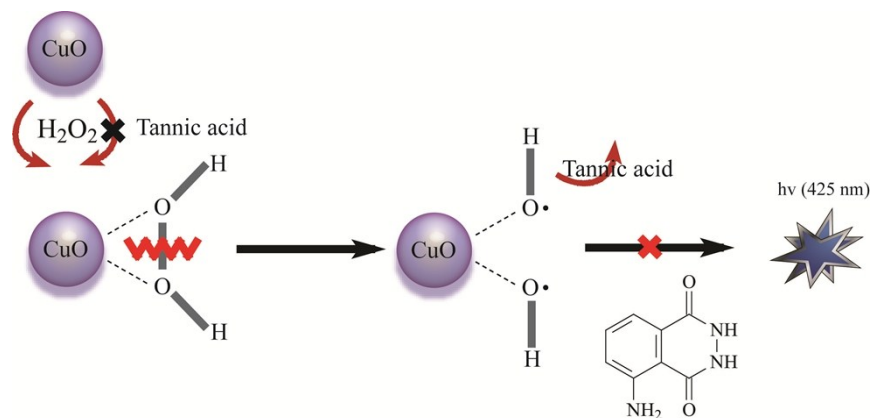

Fig. S2. Possible mechanism for the CL inhibition of luminol-H<sub>2</sub>O<sub>2</sub>-CuO NPs in the presence of tannic acid.

Table S1. Selectivity of the assay. The experiments were investigated by using a series of solutions containing 50 nM tannic acid plus various amounts of interfering compounds.

| Interfering compound | Concentration (nM) | Net CL intensity | Interfering compound | Concentration (nM) | Net CL intensity |
|----------------------|--------------------|------------------|----------------------|--------------------|------------------|
| -                    | -                  | 8875             | ascorbic acid        | 500                | 9292             |
| resorcinol           | 5000               | 9185             | dopamine             | 500                | 9301             |
| hydroquinone         | 5000               | 9256             | glutamic acid        | 500                | 9078             |
| 4-aminophenol        | 5000               | 9106             | arginine             | 500                | 8963             |
| alanine              | 5000               | 8912             | threonine            | 500                | 9105             |
| glycine              | 5000               | 8974             | histidine            | 500                | 9186             |
| leucine              | 5000               | 8890             | methionine           | 500                | 8972             |
| isoleucine           | 5000               | 9203             | praline              | 500                | 8968             |
| serine               | 5000               | 8980             | aspartic acid        | 500                | 8986             |
| phenylalanine        | 5000               | 8859             | catechol             | 250                | 9281             |
| valine               | 5000               | 8966             | pyrogallol           | 250                | 9309             |
| tryptophan           | 5000               | 9211             |                      |                    |                  |
